# Supplementary material for: Solanaceae Glycoalkaloids Disturb Lipid Metabolism in the Tenebrio molitor Beetle
Source: MDPI journal article supplement (doi:10.3390/metabo13121179), 2023-11-30
Supplement: s1 [file s1]

## SUPPLEMENTARY MATERIAL

Table S1. Concentration of lipid compounds in the haemolymph of *T. molitor* beetle 2 and 24 hours after glycoalkaloid application. Pooled samples were used with  $n \geq 15$  and the analysis were performed in triplicate. Two-way ANOVA with Dunnett's multiple comparisons test,  $\alpha = 0.05$ .

| Compound / Experimental variant |         | 2 h     |                    |                    |                    |                    |                    |                    |                    |                    |         | 24 h               |                    |                    |                    |                    |                    |                    |                    |  |  |
|---------------------------------|---------|---------|--------------------|--------------------|--------------------|--------------------|--------------------|--------------------|--------------------|--------------------|---------|--------------------|--------------------|--------------------|--------------------|--------------------|--------------------|--------------------|--------------------|--|--|
|                                 |         | Control | Solanine           |                    | Chaconine          |                    | Tomatine           |                    | Extract            |                    | Control | Solanine           |                    | Chaconine          |                    | Tomatine           |                    | Extract            |                    |  |  |
|                                 |         |         | 10 <sup>-8</sup> M | 10 <sup>-5</sup> M |         | 10 <sup>-8</sup> M | 10 <sup>-5</sup> M |  |  |
| Myristic acid isopropyl ester   | [µg/mg] | 0.1     | 0.05               | 0.09               | 0.04               | 0.01               | 0.02               | 0.04               | 0.04               | 0.12               | 0.01    | 0.08               | 0.01               | 0.02               | 0.01               | 0.01               | 0.01               | 0.02               | 0.01               |  |  |
|                                 | p       | -       | 0.9996             | >0.9999            | 0.9995             | 0.9966             | 0.9973             | 0.9995             | 0.9995             | 0.9999             | -       | 0.9995             | >0.9999            | >0.9999            | >0.9999            | >0.9999            | >0.9999            | >0.9999            | >0.9999            |  |  |
| Palmitic acid methyl ester      | [µg/mg] | 0.13    | 0                  | 0                  | 0.01               | 0.02               | 0.01               | 0.01               | 0.04               | 0.03               | 0.01    | 0.01               | 0.04               | 0.01               | 0.04               | 0.01               | 0.01               | 0.01               | 0.04               |  |  |
|                                 | p       | -       | 0.9694             | 0.9694             | 0.9808             | 0.9893             | 0.9808             | 0.9808             | 0.9966             | 0.993              | -       | >0.9999            | 0.9998             | >0.9999            | 0.9998             | >0.9999            | >0.9999            | >0.9999            | 0.9998             |  |  |
| Oleic acid methyl ester         | [µg/mg] | 0.33    | 0.03               | 0.09               | 0.07               | 0.12               | 0.08               | 0.15               | 0.1                | 0.06               | 0.09    | 0.05               | 0.08               | 0.05               | 0.12               | 0.05               | 0.12               | 0.14               | 0.06               |  |  |
|                                 | p       | -       | 0.3462             | 0.5942             | 0.5056             | 0.7286             | 0.5496             | 0.8482             | 0.6396             | 0.4629             | -       | 0.9997             | >0.9999            | 0.9997             | 0.9998             | 0.9997             | 0.9998             | 0.9997             | 0.9998             |  |  |
| Monooleoylglycerol              | [µg/mg] | 0.18    | 0.14               | 0.24               | 0.13               | 0.46               | 0.03               | 0.32               | 0.26               | 0.21               | 0.27    | 0.08               | 0.1                | 0.06               | 0.12               | 0.25               | 0.37               | 0.59               | 0.19               |  |  |
|                                 | p       | -       | 0.9997             | 0.9995             | 0.9996             | 0.4221             | 0.9344             | 0.9542             | 0.9973             | 0.9997             | -       | 0.9218             | 0.9558             | 0.8755             | 0.9781             | 0.9999             | 0.9972             | 0.498              | 0.9994             |  |  |
| Pelargonic acid                 | [µg/mg] | 0.05    | 0.03               | 0.03               | 0.03               | 0.02               | 0.02               | 0.02               | 0.02               | 0.03               | 0.03    | 0.03               | 0.03               | 0.03               | 0.03               | 0.03               | 0.03               | 0.06               | 0.04               |  |  |
|                                 | p       | -       | 0.9999             | 0.9999             | 0.9999             | 0.9997             | 0.9997             | 0.9997             | 0.9997             | 0.9999             | -       | >0.9999            | >0.9999            | >0.9999            | >0.9999            | >0.9999            | >0.9999            | 0.9998             | >0.9999            |  |  |
| Lauric acid                     | [µg/mg] | 0.12    | 0.03               | 0.03               | 0.05               | 0.05               | 0.04               | 0.06               | 0.03               | 0.05               | 0.09    | 0.04               | 0.05               | 0.02               | 0.05               | 0.11               | 0.08               | 0.06               | 0.27               |  |  |
|                                 | p       | -       | 0.9966             | 0.9966             | 0.9994             | 0.9994             | 0.9973             | 0.9995             | 0.9966             | 0.9994             | -       | 0.9997             | 0.9997             | 0.9995             | 0.9997             | 0.9999             | >0.9999            | 0.9998             | 0.9403             |  |  |
| Myristic acid                   | [µg/mg] | 1.11    | 0.18               | 0.25               | 0.27               | 0.45               | 0.11               | 0.43               | 0.23               | 0.6                | 1.15    | 0.31               | 0.45               | 0.11               | 0.41               | 0.71               | 0.53               | 0.37               | 1.22               |  |  |
|                                 | p       | -       | <0.0001            | <0.0001            | <0.0001            | 0.0007             | <0.0001            | 0.0004             | <0.0001            | 0.0166             | -       | 0.0004             | 0.0048             | <0.0001            | 0.0024             | 0.1736             | 0.0175             | 0.0012             | 0.9995             |  |  |
| Palmitic acid                   | [µg/mg] | 6.64    | 1.64               | 2.39               | 2.14               | 3.01               | 1.71               | 2.75               | 1.93               | 4.29               | 3.77    | 3.01               | 3.31               | 1.62               | 3.48               | 2.75               | 3.85               | 4.41               | 6.43               |  |  |
|                                 | p       | -       | <0.0001            | <0.0001            | <0.0001            | <0.0001            | <0.0001            | <0.0001            | <0.0001            | <0.0001            | -       | 0.0017             | 0.1403             | <0.0001            | 0.6069             | <0.0001            | 0.9994             | 0.0129             | <0.0001            |  |  |
| Margaric acid                   | [µg/mg] | 0.05    | 0.03               | 0.02               | 0.02               | 0.03               | 0.02               | 0.02               | 0.01               | 0.03               | 0.03    | 0.03               | 0.04               | 0.02               | 0.03               | 0.05               | 0.03               | 0.04               | 0.1                |  |  |
|                                 | p       | -       | 0.9999             | 0.9997             | 0.9997             | 0.9999             | 0.9997             | 0.9997             | 0.9997             | 0.9999             | -       | >0.9999            | >0.9999            | >0.9999            | >0.9999            | 0.9999             | >0.9999            | >0.9999            | 0.9995             |  |  |
| Stearic acid                    | [µg/mg] | 4.75    | 1.42               | 1.31               | 1.93               | 2.46               | 1.22               | 2.14               | 1.71               | 3.45               | 3.05    | 1.75               | 1.55               | 0.64               | 2.02               | 3.08               | 3.12               | 3.42               | 2.67               |  |  |
|                                 | p       | -       | <0.0001            | <0.0001            | <0.0001            | <0.0001            | <0.0001            | <0.0001            | <0.0001            | <0.0001            | -       | <0.0001            | <0.0001            | <0.0001            | <0.0001            | 0.9998             | 0.9995             | 0.3369             | 0.3091             |  |  |
| Arachidic acid                  | [µg/mg] | 0.06    | 0.05               | 0.06               | 0.02               | 0.06               | 0.04               | 0.04               | 0.03               | 0.04               | 0.05    | 0.04               | 0.05               | 0.06               | 0.06               | 0.04               | 0.05               | 0.05               | 0.05               |  |  |
|                                 | p       | -       | >0.9999            | >0.9999            | 0.9997             | >0.9999            | 0.9999             | 0.9999             | 0.9997             | 0.9999             | -       | >0.9999            | >0.9999            | >0.9999            | >0.9999            | >0.9999            | >0.9999            | >0.9999            | >0.9999            |  |  |
| Palmitoleic acid                | [µg/mg] | 0.45    | 0.05               | 0.14               | 0.08               | 0.29               | 0.05               | 0.23               | 0.09               | 0.35               | 0.32    | 0.13               | 0.19               | 0.05               | 0.21               | 0.19               | 0.2                | 0.09               | 0.36               |  |  |
|                                 | p       | -       | 0.101              | 0.3118             | 0.1524             | 0.91               | 0.101              | 0.6845             | 0.1734             | 0.993              | -       | 0.9218             | 0.991              | 0.6809             | 0.9966             | 0.991              | 0.9934             | 0.8184             | 0.9997             |  |  |
| Linoleic acid                   | [µg/mg] | 8.98    | 2.05               | 2.8                | 2.32               | 4.04               | 2.03               | 3.41               | 2.73               | 4.61               | 6.48    | 2.65               | 4.07               | 1.62               | 4.1                | 3.13               | 4.65               | 7.19               | 6.08               |  |  |
|                                 | p       | -       | <0.0001            | <0.0001            | <0.0001            | <0.0001            | <0.0001            | <0.0001            | <0.0001            | <0.0001            | -       | <0.0001            | <0.0001            | <0.0001            | <0.0001            | <0.0001            | <0.0001            | 0.0041             | 0.2579             |  |  |
| Oleic acid                      | [µg/mg] | 13.74   | 2.12               | 3.22               | 2.14               | 3.59               | 2.46               | 3.87               | 3.24               | 8.35               | 12.12   | 3.03               | 3.91               | 1.46               | 5.08               | 4.69               | 8.07               | 8.59               | 12.77              |  |  |
|                                 | p       | -       | <0.0001            | <0.0001            | <0.0001            | <0.0001            | <0.0001            | <0.0001            | <0.0001            | <0.0001            | -       | <0.0001            | <0.0001            | <0.0001            | <0.0001            | <0.0001            | <0.0001            | <0.0001            | 0.011              |  |  |
| Glycerol                        | [µg/mg] | 1.08    | 1                  | 0.42               | 0.03               | 1.26               | 0.91               | 0.49               | 0.27               | 0.91               | 1.29    | 0.07               | 0.17               | 1.11               | 0.42               | 0.72               | 1                  | 0.62               | 0.36               |  |  |
|                                 | p       | -       | 0.9973             | 0.0007             | <0.0001            | 0.8482             | 0.8811             | 0.0033             | <0.0001            | 0.8811             | -       | <0.0001            | <0.0001            | 0.9403             | 0.0002             | 0.036              | 0.6069             | 0.008              | <0.0001            |  |  |
| Cholesterol                     | [µg/mg] | 10.58   | 2.53               | 2.43               | 2.28               | 1.58               | 1.84               | 1.86               | 2.43               | 2.96               | 5.76    | 4.2                | 1.62               | 1.46               | 3.64               | 2.82               | 5.63               | 6.32               | 2.66               |  |  |
|                                 | p       | -       | <0.0001            | <0.0001            | <0.0001            | <0.0001            | <0.0001            | <0.0001            | <0.0001            | <0.0001            | -       | <0.0001            | <0.0001            | <0.0001            | <0.0001            | <0.0001            | 0.991              | 0.0413             | <0.0001            |  |  |
| Sitosterol                      | [µg/mg] | 2.22    | 0.51               | 0.65               | 0.86               | 0.66               | 0.56               | 0.47               | 0.61               | 1.23               | 1.12    | 1.96               | 0.75               | 0.42               | 0.37               | 0.66               | 1.49               | 1.8                | 0.52               |  |  |
|                                 | p       | -       | <0.0001            | <0.0001            | <0.0001            | <0.0001            | <0.0001            | <0.0001            | <0.0001            | <0.0001            | -       | 0.0004             | 0.3369             | 0.0048             | 0.002              | 0.1403             | 0.3369             | 0.0068             | 0.0235             |  |  |

Table S2. Concentration of lipid compounds in the fat body of *T. molitor* beetle 2 and 24 hours after glycoalkaloid application. Pooled samples were used with n ≥ 10 and the analysis were performed in triplicate. Two-way ANOVA with Dunnett's multiple comparisons test, α = 0.05.

| Compound / Experimental variant |         | 2 h     |                    |                    |                    |                    |                    |                    |                    |                    |         | 24 h               |                    |                    |                    |                    |                    |                    |                    |  |  |
|---------------------------------|---------|---------|--------------------|--------------------|--------------------|--------------------|--------------------|--------------------|--------------------|--------------------|---------|--------------------|--------------------|--------------------|--------------------|--------------------|--------------------|--------------------|--------------------|--|--|
|                                 |         | Control | Solanine           |                    | Chaconine          |                    | Tomatine           |                    | Extract            |                    | Control | Solanine           |                    | Chaconine          |                    | Tomatine           |                    | Extract            |                    |  |  |
|                                 |         |         | 10 <sup>-8</sup> M | 10 <sup>-5</sup> M |         | 10 <sup>-8</sup> M | 10 <sup>-5</sup> M |  |  |
| Linoleic acid methyl ester      | [μg/mg] | 0.47    | 0.06               | 0.02               | 0.03               | 0.08               | 0.04               | 0.02               | 0.36               | 0.46               | 0.46    | 0.05               | 0.07               | 0.2                | 0.11               | 0.16               | 0.02               | 0                  | 0.07               |  |  |
|                                 | p       | -       | 0.9836             | 0.9694             | 0.9733             | 0.9878             | 0.9778             | 0.9712             | 0.9997             | >0.9999            | -       | 0.8663             | 0.8888             | 0.9886             | 0.9369             | 0.9703             | 0.8322             | 0.7997             | 0.8888             |  |  |
| Oleic acid methyl ester         | [μg/mg] | 0.94    | 0.12               | 0.08               | 0.24               | 0.24               | 0.13               | 0.15               | 0.94               | 0.65               | 1.09    | 0.2                | 0.07               | 0.24               | 0.07               | 0.1                | 0.09               | 0.13               | 0.35               |  |  |
|                                 | p       | -       | 0.6206             | 0.573              | 0.7744             | 0.7685             | 0.6374             | 0.6591             | >0.9999            | 0.9971             | -       | 0.1424             | 0.0623             | 0.1755             | 0.0636             | 0.0767             | 0.0697             | 0.0937             | 0.2981             |  |  |
| Glyceryl palmitate              | [μg/mg] | 0.49    | 0.3                | 0.08               | 0.24               | 0.03               | 0.25               | 0.09               | 0.22               | 0.5                | 0.07    | 0.34               | 0.08               | 0.16               | 0.03               | 0.07               | 0.6                | 0.15               | 0.11               |  |  |
|                                 | p       | -       | 0.9995             | 0.9839             | 0.9994             | 0.9658             | 0.9994             | 0.987              | 0.9975             | >0.9999            | -       | 0.9867             | >0.9999            | 0.9997             | 0.9999             | >0.9999            | 0.6654             | 0.9997             | 0.9999             |  |  |
| Succinic acid                   | [μg/mg] | 0.38    | 0.08               | 0.01               | 0.03               | 0.03               | 0.12               | 0                  | 0.1                | 0.23               | 0.12    | 0.03               | 0.02               | 0.07               | 0.02               | 0.04               | 0.27               | 0.25               | 0                  |  |  |
|                                 | p       | -       | 0.9969             | 0.9911             | 0.993              | 0.9931             | 0.9976             | 0.9898             | 0.9972             | 0.9996             | -       | 0.9997             | 0.9996             | 0.9998             | 0.9997             | 0.9997             | 0.9994             | 0.9995             | 0.9996             |  |  |
| Pelargonic acid                 | [μg/mg] | 0.21    | 0.19               | 0.19               | 0.37               | 0.1                | 0.48               | 0.17               | 0.13               | 0.27               | 0.19    | 0.34               | 0.17               | 0.2                | 0.17               | 0.31               | 0.14               | 0.24               | 0.19               |  |  |
|                                 | p       | -       | >0.9999            | >0.9999            | 0.9996             | 0.9997             | 0.9974             | >0.9999            | 0.9998             | 0.9999             | -       | 0.9994             | >0.9999            | >0.9999            | >0.9999            | 0.9996             | 0.9998             | 0.9998             | >0.9999            |  |  |
| Capric acid                     | [μg/mg] | 0.11    | 0.02               | 0.01               | 0.01               | 0.01               | 0.02               | 0                  | 0.02               | 0.07               | 0.03    | 0.06               | 0.01               | 0                  | 0.01               | 0.08               | 0.02               | 0.04               | 0.01               |  |  |
|                                 | p       | -       | 0.9998             | 0.9997             | 0.9997             | 0.9997             | 0.9998             | 0.9997             | 0.9998             | >0.9999            | -       | >0.9999            | >0.9999            | >0.9999            | >0.9999            | 0.9998             | >0.9999            | >0.9999            | >0.9999            |  |  |
| Lauric acid                     | [μg/mg] | 0.22    | 0.33               | 0.1                | 0.09               | 0.13               | 0.28               | 0.22               | 0.24               | 0.2                | 0.21    | 0.05               | 0.28               | 0.23               | 0.25               | 0.25               | 0.27               | 0.25               | 0.14               |  |  |
|                                 | p       | -       | 0.9997             | 0.9997             | 0.9997             | 0.9998             | 0.9999             | >0.9999            | >0.9999            | >0.9999            | -       | 0.9993             | 0.9998             | >0.9999            | 0.9999             | 0.9999             | 0.9998             | 0.9999             | 0.9997             |  |  |
| Palmitic acid                   | [μg/mg] | 28.31   | 16.8               | 17.76              | 17.2               | 22.19              | 21.86              | 24.7               | 19.93              | 36.38              | 20.51   | 22.99              | 27.76              | 18.79              | 29.16              | 29.84              | 24.96              | 28.17              | 15.18              |  |  |
|                                 | p       | -       | <0.0001            | <0.0001            | <0.0001            | <0.0001            | <0.0001            | <0.0001            | <0.0001            | <0.0001            | -       | <0.0001            | <0.0001            | 0.0001             | <0.0001            | <0.0001            | <0.0001            | <0.0001            | <0.0001            |  |  |
| Stearic acid                    | [μg/mg] | 16.64   | 7.26               | 5.13               | 11.14              | 4.28               | 12.88              | 5.53               | 8.17               | 16.1               | 6.78    | 10.61              | 7.47               | 11.44              | 4.57               | 9.79               | 6.41               | 14.58              | 6.59               |  |  |
|                                 | p       | -       | <0.0001            | <0.0001            | <0.0001            | <0.0001            | <0.0001            | <0.0001            | <0.0001            | 0.9259             | -       | <0.0001            | 0.3784             | <0.0001            | <0.0001            | <0.0001            | 0.9192             | <0.0001            | 0.9973             |  |  |
| Myristic acid                   | [μg/mg] | 3.57    | 1.25               | 1.09               | 1.63               | 2.13               | 1.88               | 2.43               | 2.38               | 4.47               | 2.21    | 2.17               | 3.2                | 2.08               | 3.35               | 3.52               | 3.22               | 3.05               | 2.26               |  |  |
|                                 | p       | -       | 0.0007             | 0.0002             | 0.0075             | 0.0889             | 0.0284             | 0.2721             | 0.2271             | 0.5164             | -       | 0.9999             | 0.0787             | 0.9995             | 0.0281             | 0.0072             | 0.0675             | 0.1832             | 0.9999             |  |  |
| Palmitoleic acid                | [μg/mg] | 1.33    | 0.56               | 0.48               | 0.62               | 0.92               | 0.83               | 0.87               | 0.84               | 1.24               | 0.86    | 0.83               | 1.08               | 0.89               | 0.99               | 1.13               | 1.11               | 0.89               | 0.57               |  |  |
|                                 | p       | -       | 0.6948             | 0.5832             | 0.7625             | 0.9851             | 0.951              | 0.9697             | 0.957              | 0.9998             | -       | >0.9999            | 0.9966             | >0.9999            | 0.9995             | 0.988              | 0.9913             | >0.9999            | 0.976              |  |  |
| Linoleic acid                   | [μg/mg] | 28.49   | 23.67              | 14                 | 23.14              | 20.96              | 25.66              | 28.02              | 20.18              | 24.94              | 19.47   | 27.69              | 28.21              | 29.28              | 31.09              | 23.43              | 21.97              | 24.04              | 13.7               |  |  |
|                                 | p       | -       | <0.0001            | <0.0001            | <0.0001            | <0.0001            | <0.0001            | 0.9607             | <0.0001            | <0.0001            | -       | <0.0001            | <0.0001            | <0.0001            | <0.0001            | <0.0001            | <0.0001            | <0.0001            | <0.0001            |  |  |
| Oleic acid                      | [μg/mg] | 46.24   | 30.31              | 27.33              | 33.93              | 35.21              | 40.44              | 40.48              | 34.29              | 50.69              | 33.14   | 38.15              | 46.65              | 35.34              | 42.92              | 44.93              | 33.52              | 44.14              | 23.42              |  |  |
|                                 | p       | -       | <0.0001            | <0.0001            | <0.0001            | <0.0001            | <0.0001            | <0.0001            | <0.0001            | <0.0001            | -       | <0.0001            | <0.0001            | <0.0001            | <0.0001            | <0.0001            | 0.9035             | <0.0001            | <0.0001            |  |  |
| Glycerol                        | [μg/mg] | 4.03    | 1                  | 0.96               | 0.86               | 0.67               | 1.25               | 1.2                | 2.71               | 5.17               | 2.68    | 1.23               | 1.36               | 1.13               | 0.77               | 1.84               | 4.38               | 5.3                | 3.65               |  |  |
|                                 | p       | -       | <0.0001            | <0.0001            | <0.0001            | <0.0001            | <0.0001            | <0.0001            | 0.1405             | 0.2679             | -       | 0.0018             | 0.0063             | 0.0007             | <0.0001            | 0.1765             | 0.0002             | <0.0001            | 0.0849             |  |  |
| Cholesterol                     | [μg/mg] | 15.62   | 8.07               | 5.55               | 13.75              | 1.98               | 11                 | 6.01               | 9.41               | 12.12              | 6.48    | 14.26              | 7.2                | 15.86              | 4.73               | 7.39               | 11.42              | 13.72              | 7.45               |  |  |
|                                 | p       | -       | <0.0001            | <0.0001            | 0.0107             | <0.0001            | <0.0001            | <0.0001            | <0.0001            | <0.0001            | -       | <0.0001            | 0.3207             | <0.0001            | <0.0001            | 0.1191             | <0.0001            | <0.0001            | 0.0875             |  |  |
| Sitosterol                      | [μg/mg] | 2.89    | 1.72               | 0.34               | 2.41               | 0.89               | 3.11               | 0.97               | 1.85               | 0.89               | 1.06    | 1.88               | 1.85               | 2.1                | 0.74               | 2.2                | 1.98               | 1.04               | 1.29               |  |  |
|                                 | p       | -       | 0.2388             | 0.0001             | 0.9589             | 0.0054             | 0.9994             | 0.0086             | 0.3632             | 0.0052             | -       | 0.2003             | 0.2356             | 0.0546             | 0.9599             | 0.0261             | 0.113              | >0.9999            | 0.9933             |  |  |
